# Supplementary material
Source: Research Square preprint supplement (doi:10.21203/rs.3.rs-9967642/v1)
Supplement: Supplementary file 1 [file d4c334cc6c841b563db73c98.docx]

**SUPPLEMENTARY MATERIAL**

In Table S1, the statistical tests indicated that the time series were non-stationary in levels. To test for cointegration, the Engle–Granger two-step procedure was applied. First, a long-run equilibrium relationship was estimated by regressing the time series. In the second step, the residuals from the cointegration regression were tested for stationarity using the ADF test. The results indicated that the residuals are stationary (t = -4.060, *p* = .001). Therefore, the variables are cointegrated, suggesting the existence of a stable long-run equilibrium relationship among cigarettes sales, price and wage.

| **Table S1**  *ADF tests of time series variables* | | |
| --- | --- | --- |
|  | Level | |
|  | t | *p* |
| Cigarettes sales | -.794 | .966 |
| Cigarette price | -2.587 | .286 |
| Wage | -1.303 | .887 |
| *Note*. Maximum lag length = 12 | | |

Given evidence of residual autocorrelation based on Breusch–Godfrey tests (Table S2), which persists even after including multiple lags and indicates long-memory dynamics, we report Newey–West standard errors allowing for autocorrelation up to 12 lags to ensure robust inference.

| **Table S2**  *Breusch-Godfrey test for autocorrelation in baseline model* | | |
| --- | --- | --- |
| Lags (p) | χ2 | *p* |
| 1 | 9.443 | .002 |
| 2 | 9.643 | .008 |
| 3 | 66.040 | < .001 |
| 4 | 66.139 | < .001 |
| 5 | 66.339 | < .001 |
| 6 | 72.271 | < .001 |
| 7 | 73.605 | < .001 |
| 8 | 73.606 | < .001 |
| 9 | 73.618 | < .001 |
| 10 | 75.400 | < .001 |
| 11 | 75.401 | < .001 |
| 12 | 75.417 | < .001 |
|  | | |

The instrument (i.e., specific tax on tobacco) showed strong relevance in the first stage (F-statistic > 10; r = 0.953), indicating a strong correlation with cigarette prices. Durbin–Wu–Hausman tests suggested that price may be endogenous (*p* < .001), supporting the use of IV estimation. In the IV specification, the estimated price elasticity was slightly larger in magnitude than in the baseline models (Table S3), indicating that conventional estimates may underestimate the responsiveness of demand to price changes. The direction and significance of the coefficients remain consistent across specifications. The IV model was estimated without lag terms or policy variables to focus on the contemporaneous effect of prices and to avoid overlap with the tax-based instrument.

| **Table S3**  *Instrumental variable regression vs control Newey-West regression* | | | | | | | |
| --- | --- | --- | --- | --- | --- | --- | --- |
|  | *IV* | | | *Control* | | | |
| Variable | Estimate | *z* | *p* | Estimate | *t* | *p* |
| Price | -1.168 | -19.31 | < .001 | -1.000 | -12.58 | < .001 |
| Wage | 1.161 | 12.47 | < .001 | 1.060 | 5.32 | < .001 |
| COVID | -.206 | -4.27 | < .001 | -.193 | -7.16 | < .001 |
| Trend | -.002 | -5.28 | < .001 | -.002 | -4.77 | < .001 |
| Note. IV = instrumental variable. | | | | | | | |

Model specification tests did not indicate misspecification of the functional form (RESET test, F = 1.94, *p* = .124). VIF indicated the presence of multicollinearity among trending variables, which is expected in time series settings and does not affect the consistency of the estimates.
